# Supplementary material
Source: ML conference proceedings conference paper supplement (https://openaccess.thecvf.com/content/cvpr_2015/html/Xie_DeepShape_Deep_Learned_2015_CVPR_paper.html)

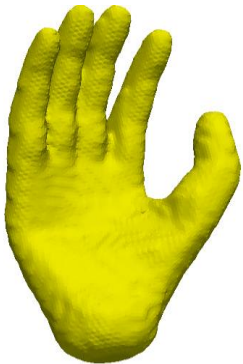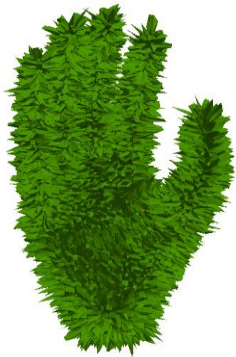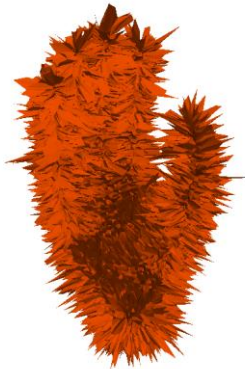

Supplement: Supplementary file 3 [file Xie_DeepShape_Deep_Learned_2015_CVPR_supplemental.zip]

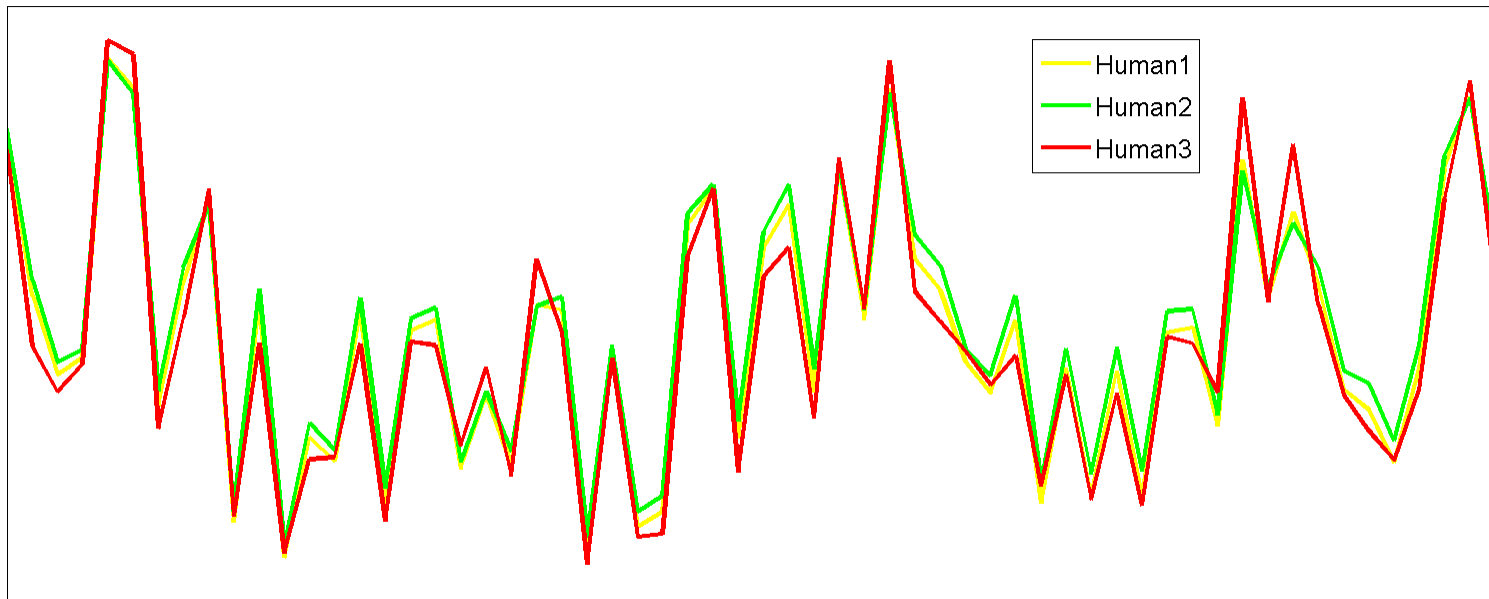

Supplement: Supplementary file 4 [file Xie_DeepShape_Deep_Learned_2015_CVPR_supplemental.zip]

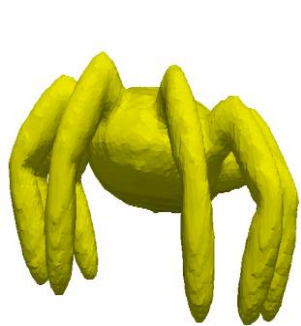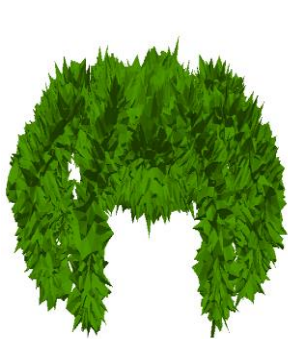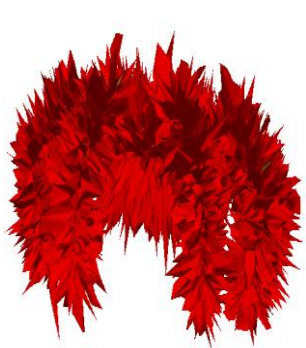

Supplement: Supplementary file 5 [file Xie_DeepShape_Deep_Learned_2015_CVPR_supplemental.zip]

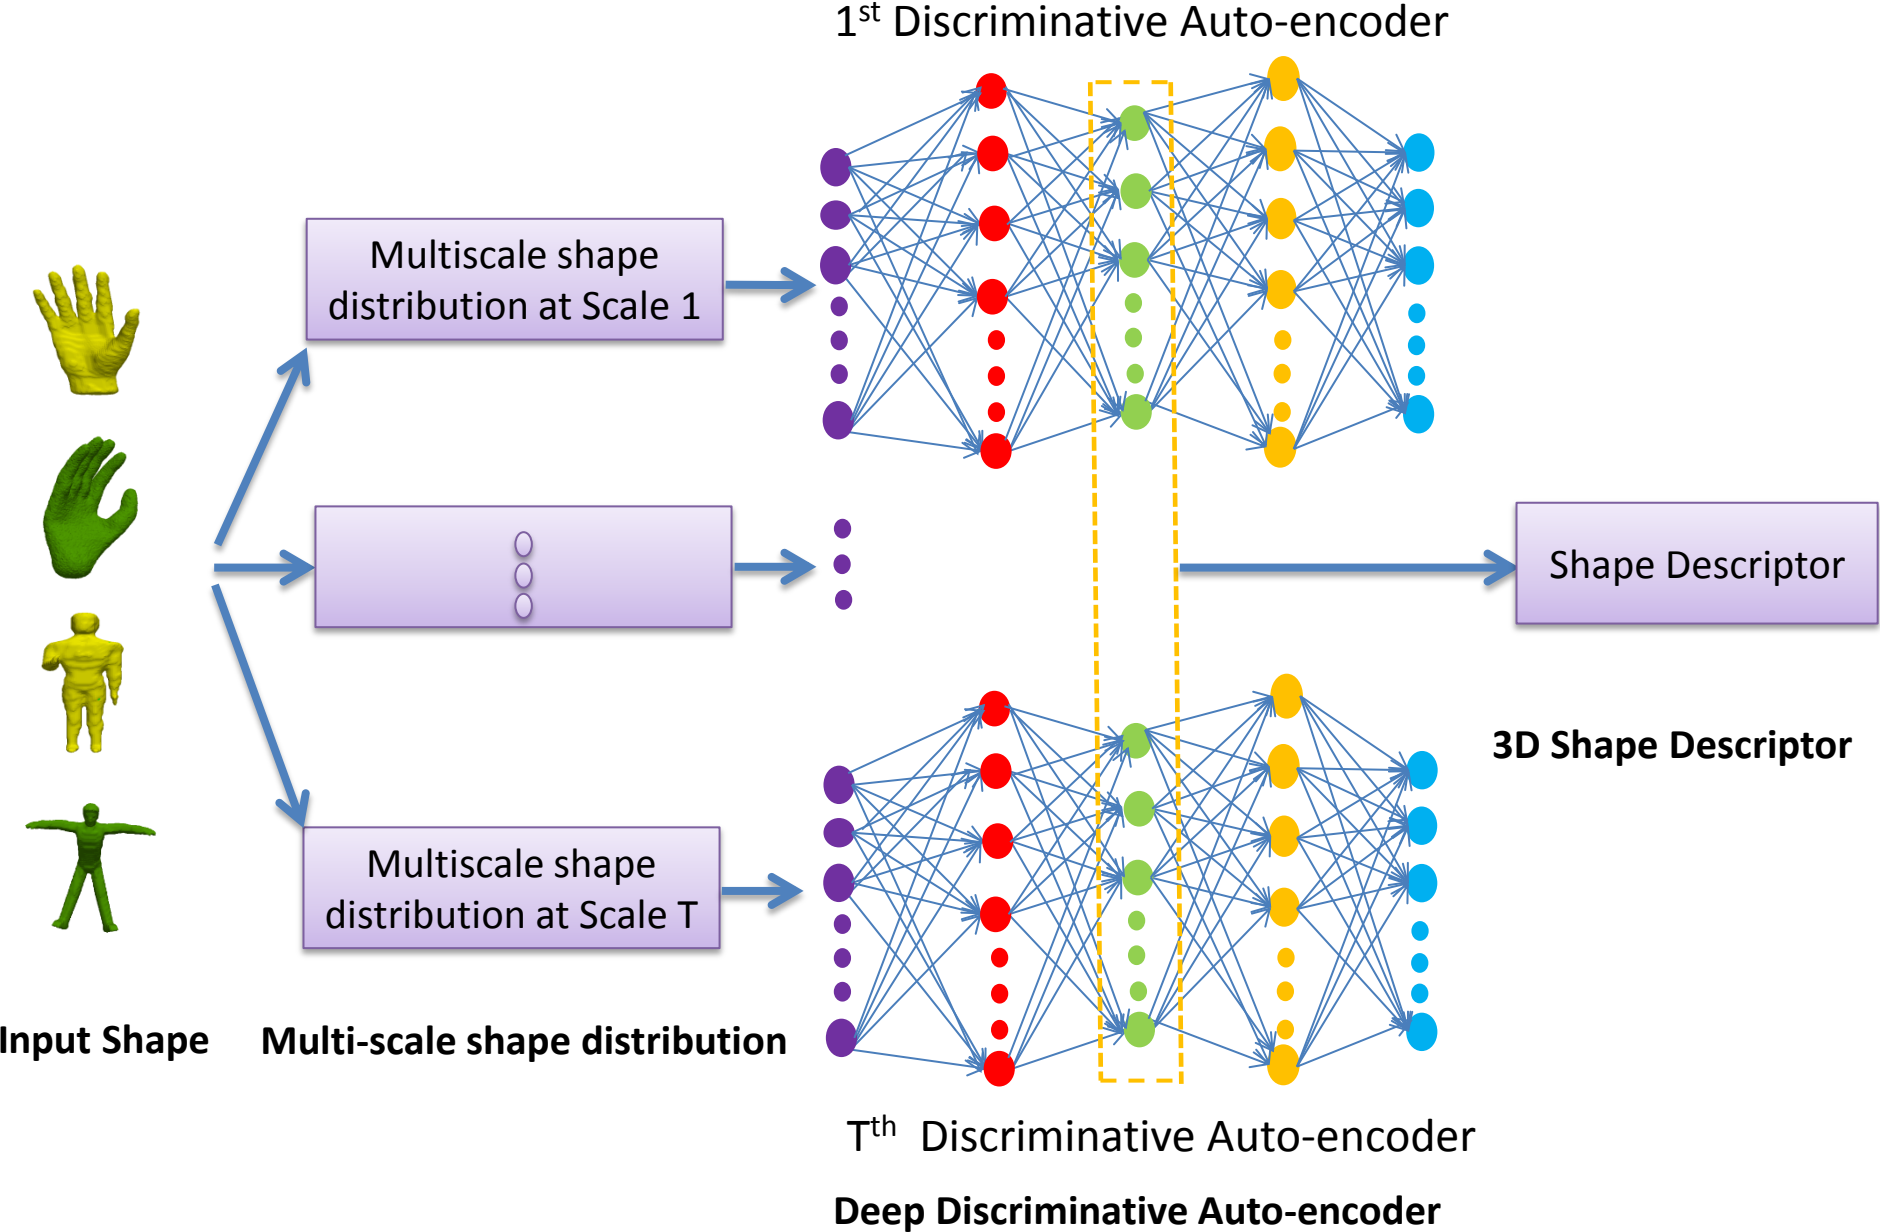

Supplement: Supplementary file 6 [file Xie_DeepShape_Deep_Learned_2015_CVPR_supplemental.zip]

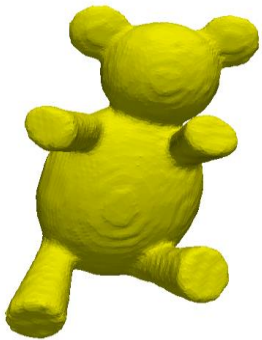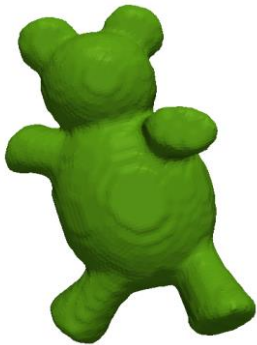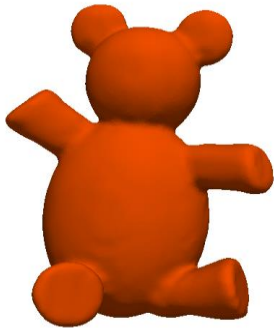

Supplement: Supplementary file 7 [file Xie_DeepShape_Deep_Learned_2015_CVPR_supplemental.zip]

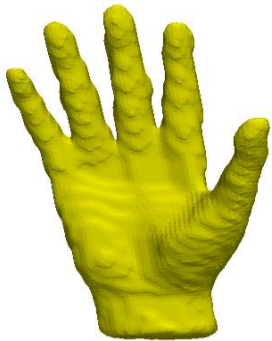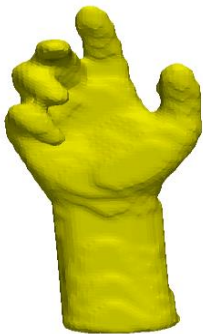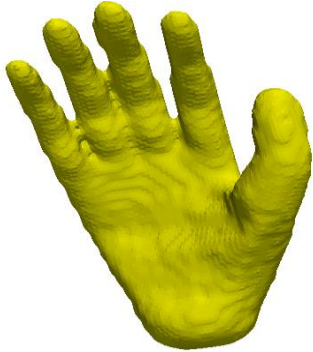

Supplement: Supplementary file 9 [file Xie_DeepShape_Deep_Learned_2015_CVPR_supplemental.zip]

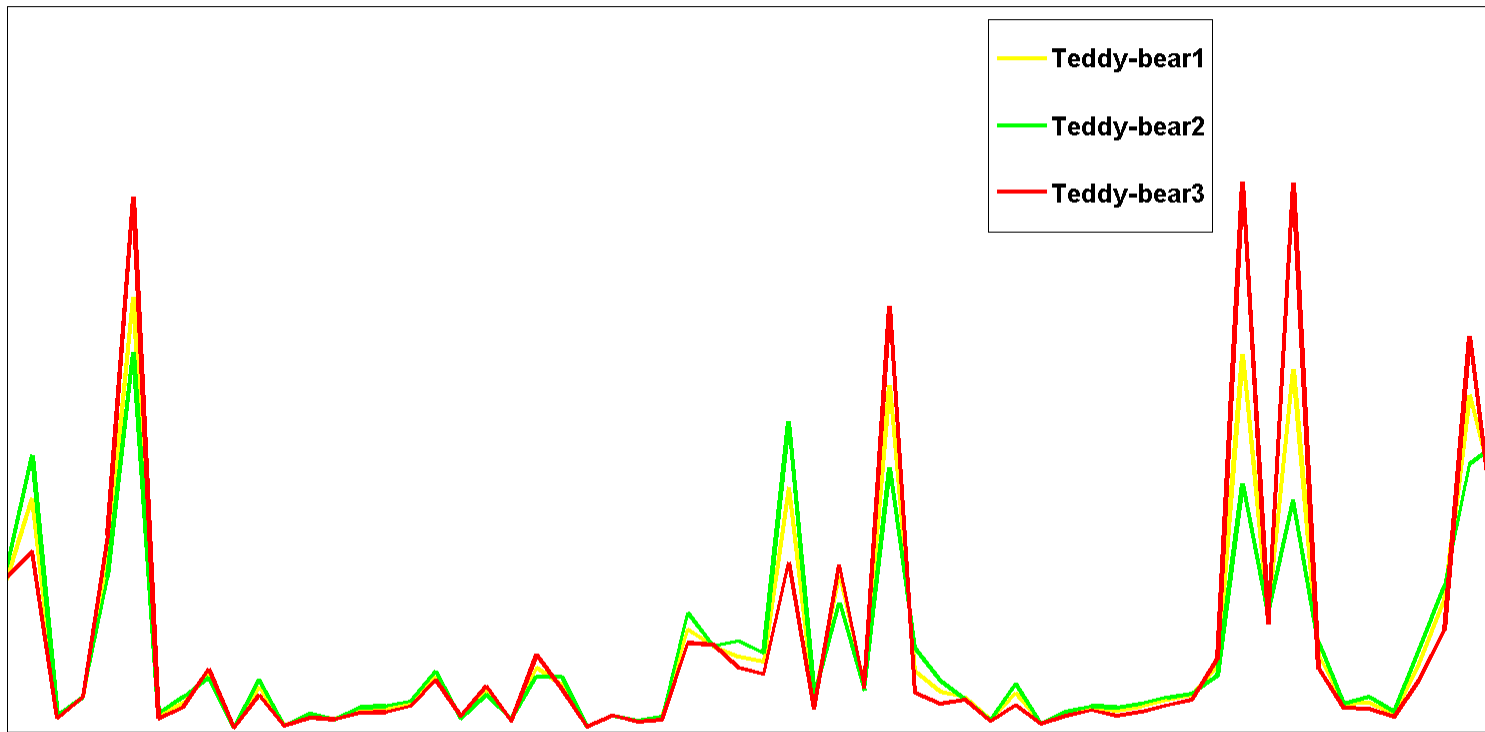

Supplement: Supplementary file 10 [file Xie_DeepShape_Deep_Learned_2015_CVPR_supplemental.zip]

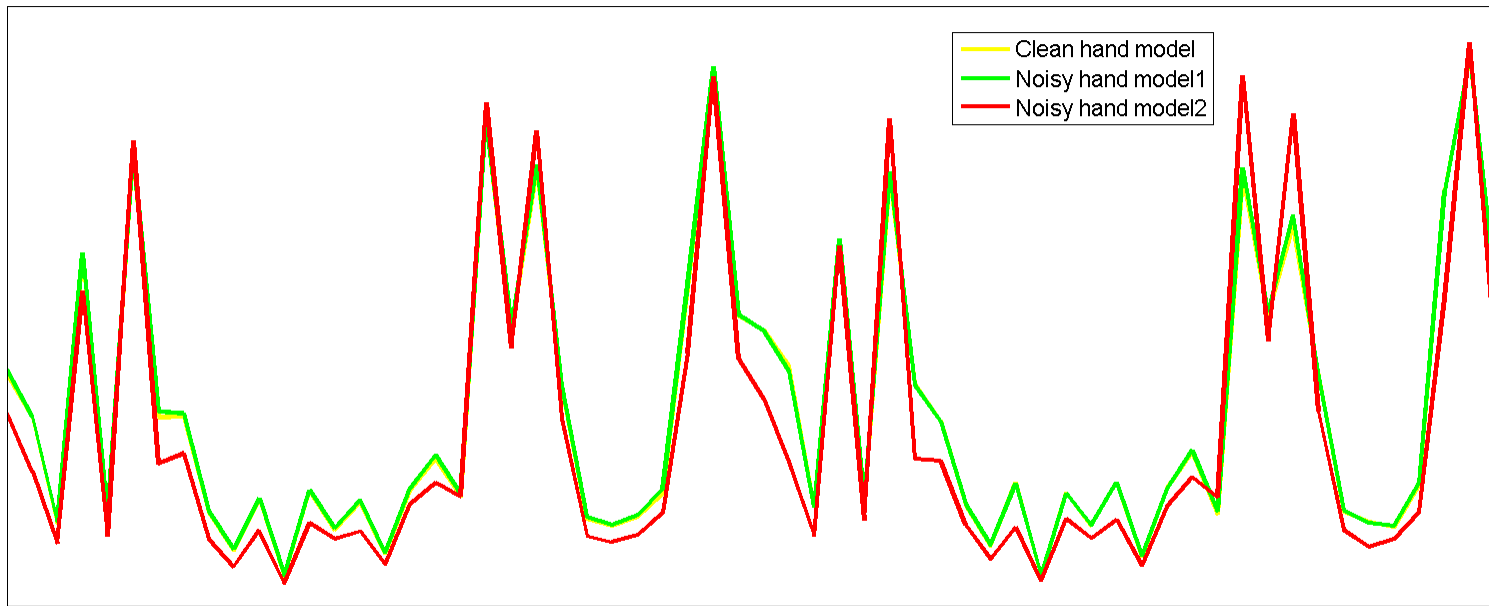

Supplement: Supplementary file 11 [file Xie_DeepShape_Deep_Learned_2015_CVPR_supplemental.zip]

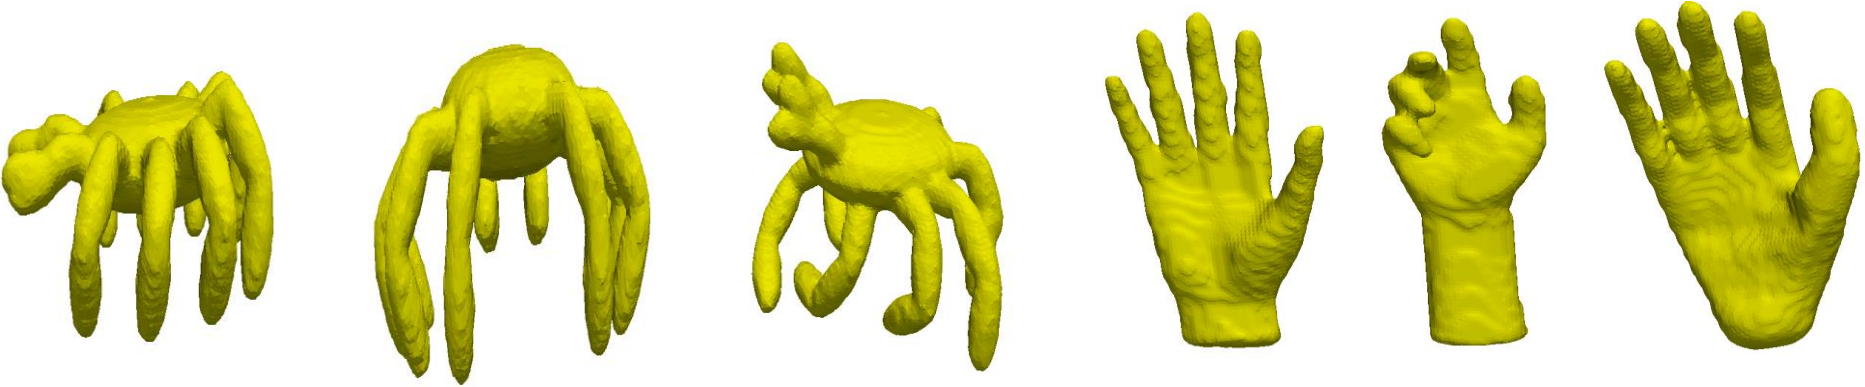

Supplement: Supplementary file 12 [file Xie_DeepShape_Deep_Learned_2015_CVPR_supplemental.zip]

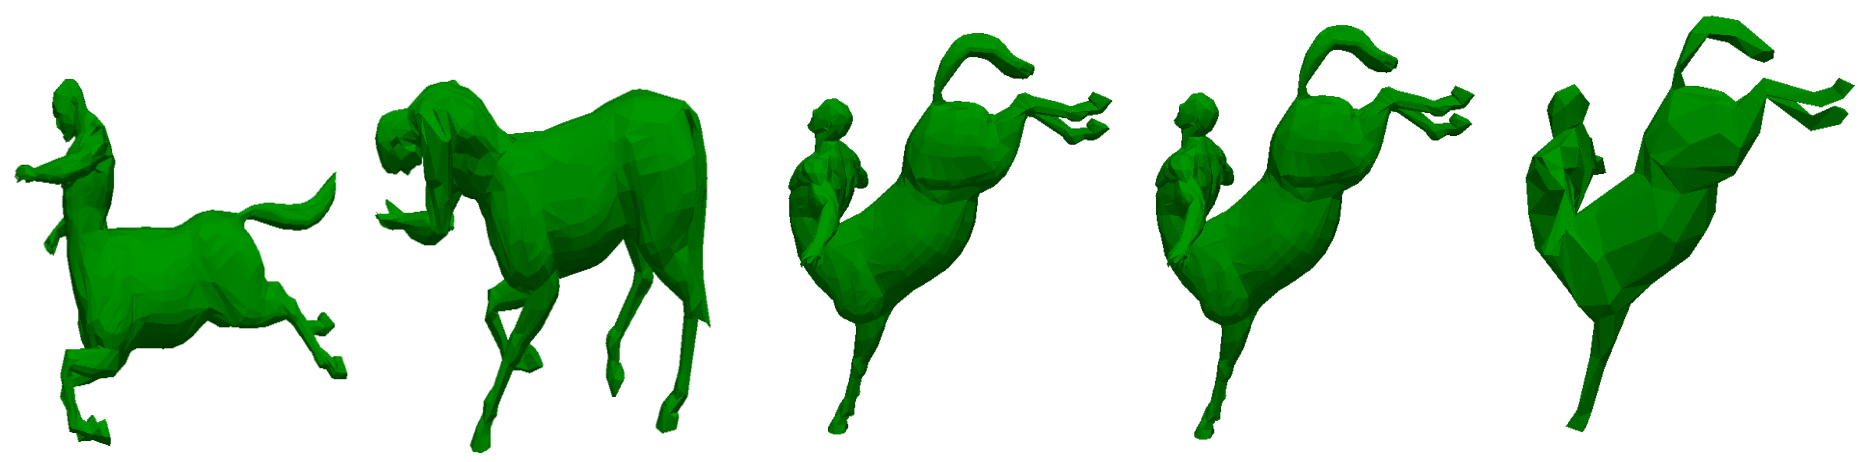

Supplement: Supplementary file 14 [file Xie_DeepShape_Deep_Learned_2015_CVPR_supplemental.zip]

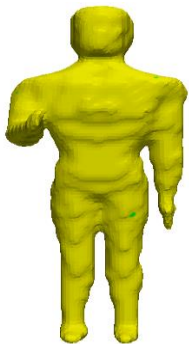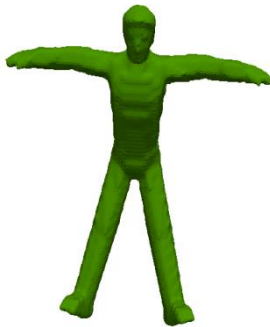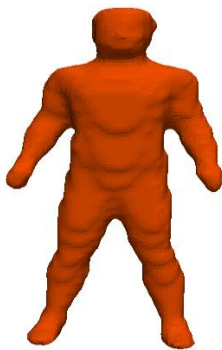

Supplement: Supplementary file 15 [file Xie_DeepShape_Deep_Learned_2015_CVPR_supplemental.zip]

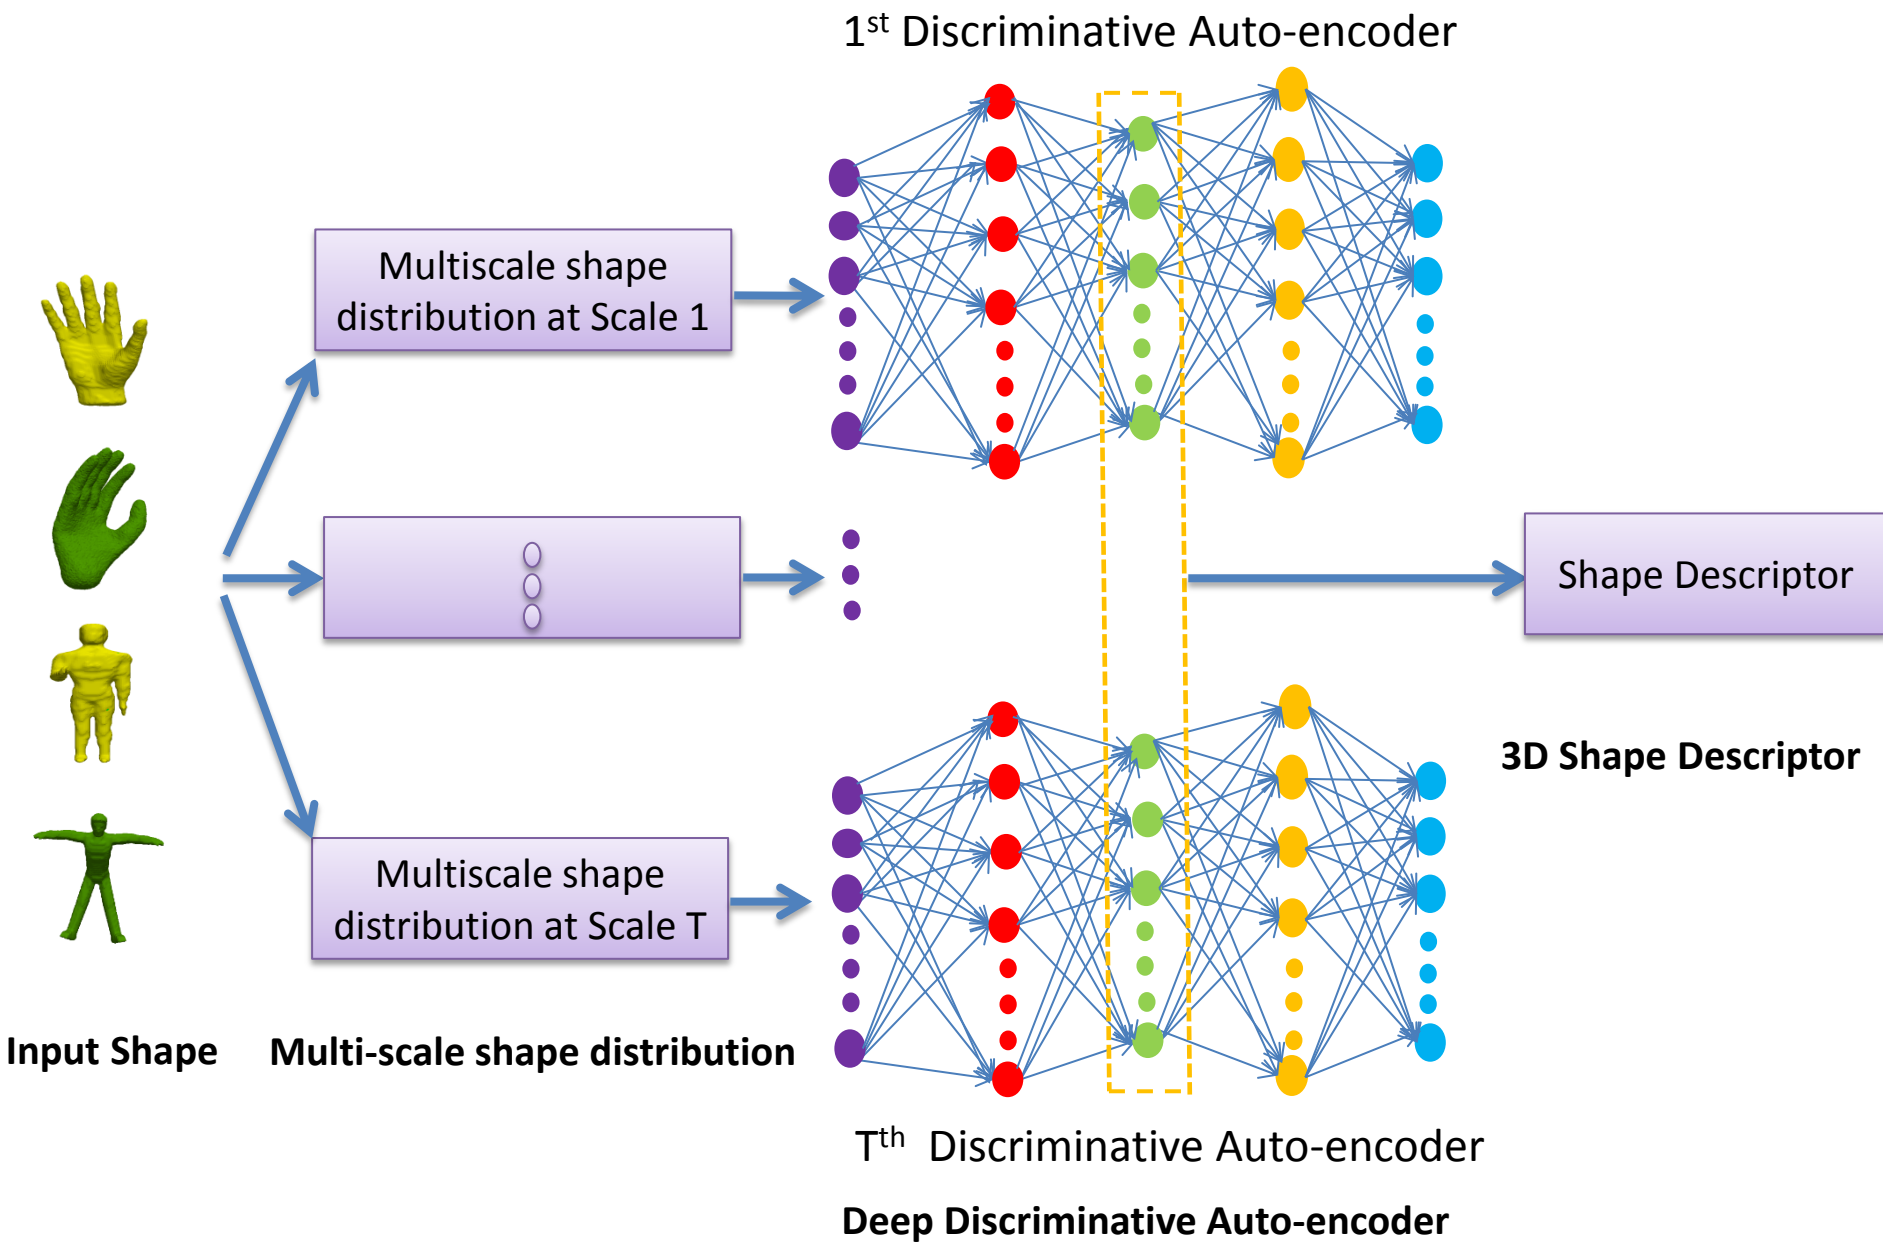

Supplement: Supplementary file 16 [file Xie_DeepShape_Deep_Learned_2015_CVPR_supplemental.zip]

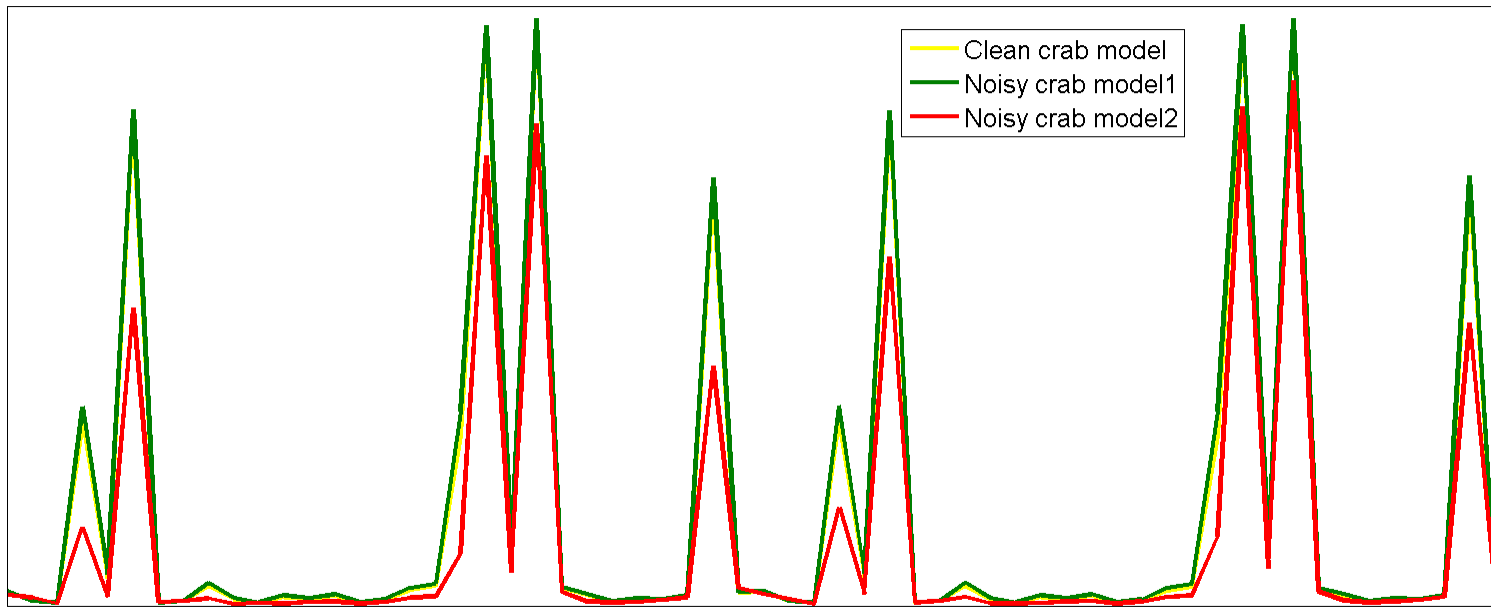

Supplement: Supplementary file 18 [file Xie_DeepShape_Deep_Learned_2015_CVPR_supplemental.zip]
